# Supplementary material
Source: PubMed Central journal article supplement (PMC5742537)
Supplement: NIHMS74888-supplement-Supplementary_table_1.pdf [file NIHMS74888-supplement-Supplementary_table_1.pdf]

**Supplementary Table 1.**  
**Confidence intervals for raw data distributions**

| <b>Figure Panel</b> | <b>Parameter assessed</b>                                                              | <b>Lower 95%<br/>CI of mean</b> | <b>Upper 95%<br/>CI of mean</b> |
|---------------------|----------------------------------------------------------------------------------------|---------------------------------|---------------------------------|
| Figure 1I           | Average amplitude of Ca <sup>2+</sup> transients per myelin sheath                     | 0.9145                          | 1.707                           |
| Figure 1J           | Average duration of Ca <sup>2+</sup> transients per myelin sheath                      | 24.72                           | 29.29                           |
| Figure 1K           | Correlation between Ca <sup>2+</sup> transient amplitude and duration                  | 0.06951                         | 0.25                            |
| Figure 2B           | Average amplitude of Ca <sup>2+</sup> transients in stabilised sheaths                 | 0.7147                          | 1.088                           |
|                     | Average amplitude of Ca <sup>2+</sup> transients in sheaths retracted                  | 1.342                           | 6.584                           |
| Figure 2C           | Average duration of Ca <sup>2+</sup> transients in stabilised sheaths                  | 23.6                            | 28.55                           |
|                     | Average duration of Ca <sup>2+</sup> transients in sheaths retracted                   | 27.24                           | 38.83                           |
| Figure 2H           | Myelin sheath number per oligodendrocyte (DMSO)                                        | 12.81                           | 15.97                           |
|                     | Myelin sheath number per oligodendrocyte (PD150606)                                    | 16.61                           | 20.78                           |
| Figure 2I           | Number of sheaths retracted/ hour (DMSO)                                               | 0.2668                          | 0.4163                          |
|                     | Number of sheaths retracted/ hour (PD150606)                                           | 0.191                           | 0.2807                          |
| Figure 2J           | Myelin sheath number per oligodendrocyte (mbp:meGFP)                                   | 13.42                           | 18.12                           |
|                     | Myelin sheath number per oligodendrocyte (mbp:meGFP_calpastatin)                       | 18.26                           | 22.7                            |
| Figure 3C           | Speed of growth of sheaths exhibiting 0 transient/h                                    | -0.1137                         | 0.04157                         |
|                     | Speed of growth of sheaths exhibiting <1 transient/h                                   | 0.0177                          | 0.215                           |
|                     | Speed of growth of sheaths exhibiting 1-2 transients/h                                 | 0.07212                         | 0.2444                          |
|                     | Speed of growth of sheaths exhibiting 2-3 transients/h                                 | 0.07062                         | 0.3671                          |
|                     | Speed of growth of sheaths exhibiting >3 transients/h                                  | 0.281                           | 0.6197                          |
| Figure 3D           | Correlation between myelin sheath growth rate and Ca <sup>2+</sup> transient frequency | 0.2487                          | 0.4672                          |
| Figure 3E           | Linear regression analyses of                                                          |                                 |                                 |

|                         |                                                                                        |          |          |
|-------------------------|----------------------------------------------------------------------------------------|----------|----------|
|                         | change in myelin sheath length after Ca <sup>2+</sup> transients                       | 0.004247 | 0.007626 |
| Supplementary Figure 1D | Duration of individual Ca <sup>2+</sup> in myelin sheaths                              | 17.35    | 29.05    |
| Supplementary Figure 5D | Myelin sheath number per oligodendrocyte mbp:meGFP                                     | 14.73    | 18.45    |
|                         | Myelin sheath number per oligodendrocyte mbp:meGFP and <i>cast</i> mRNA                | 18.05    | 21.48    |
| Supplementary Figure 6A | Correlation between myelin sheath growth rate and Ca <sup>2+</sup> transient amplitude | -0.2737  | 0.02997  |
| Supplementary Figure 6B | Correlation between myelin sheath growth rate and Ca <sup>2+</sup> transient duration  | -0.129   | 0.1792   |
